# Supplementary material for: Public-Academic Partnerships: A Rapid Small-Grant Program for Policy-Relevant Research: Motivating Public-Academic Partnerships
Source: Atypon-hosted journal article supplement (doi:10.1176/appi.ps.201200519), 2013-02-01
Supplement: 106_ds001.pdf [file 106_ds001.pdf]

**\*\*\*\*Opportunities for Rapid Research Funding for Investigators at  
Columbia University and NYSPI\*\*\*\***

**Small Grants Available Now for Research on Topics of High Policy  
Relevance to the New York State Office of Mental Health (OMH)**

**Request for Proposals, Release Date: March 9, 2012**

**Topic: Policy Relevant Mental Health Services Research**

**Purpose and General Instructions:**

The New York State Office of Mental Health (OMH) is announcing its intent to continue to fund a program to encourage researchers at Columbia University/ New York State Psychiatric Institute (NYSPI) to conduct projects on topics identified by OMH as being of high policy relevance in the coming year (please see topic list at the end of this announcement). These awards will be administered by the Research Foundation for Mental Hygiene, Inc. (RFMH) on behalf of the Division of Mental Health Services and Policy Research (DMHSPR) at NYSPI. Recipients of these funds will be known as **OMH Policy Scholars** and will be invited to present their work at OMH planning sessions. The purpose of this announcement is to invite applications for grants to be funded by this program.

The healthcare issues and business interests of OMH are similar to those faced by behavioral health delivery systems nationwide, hence research projects funded under this initiative are likely to be of high public health significance nationally. Funded projects will be of immediate policy relevance to OMH and small enough in scope to be completed in one year. Depending on the existing knowledge base in the research area, projects may range from critical reviews of the existing evidence base, through analyses of secondary data, creating performance monitoring tools, qualitative interviews with key informants, or mounting new clinical interventions and assessing their effectiveness. Ideally, these projects will produce pilot data or other background material to strengthen grant proposals to NIMH and other funding sources on ways to identify, implement, sustain new and effective policies or treatment protocols in these target areas. To enhance projects' feasibility and to help ensure that the research projects' findings will inform OMH's practices. An OMH facilitator will be paired with each funded applicant. This mentor will help the applicant understand OMH's mission and functioning. They will facilitate obtaining access to data, information, or other resources from OMH or its sister state agencies that may be necessary to conduct the research.

OMH has an annual budget of over \$3 billion to fulfill its mission of promoting the mental health of all New Yorkers with a particular focus on providing hope and recovery for adults with serious mental illness and children with serious emotional disturbances. OMH's Commissioner, Michael Hogan, is served by an Executive Team, and the potential topic areas listed below are of

interest to one or more of these senior staff . Hence,these awards afford the successful applicant the opportunity to work in partnership with a large state mental health agency on a topic of current policy importance. For junior investigators or for more senior individuals new to such public-academic partnerships; a senior member of the NYSPI Division of Mental Health Services and Policy Research (DMHSPR) will serve as a mentor in addition to the OMH facilitator to help insure the success of each funded project.

DMHSPR anticipates awarding approximately \$100,000 under this announcement in 2012.<sup>1</sup> Proposals seeking modest support are encouraged and are more likely to be funded so that more projects can be conducted. The average award size is anticipated to be under \$20,000 in direct costs, with variability across projects.

The first application deadline is 5:00 PM on April 9, 2012. Funding may be requested to commence as early as May 17, 2012. Proposals will be accepted on a rolling basis after this deadline contingent upon the continued availability of funds. Please contact the administrator of this award, listed below, for information on availability of funds after May 17, 2012.

### **Eligibility Requirements:**

- Individuals at Columbia University with an academic appointment in psychiatry (including residents, interns, and fellows) and graduate students and junior faculty at Columbia pursuing mental health services research. Preference will be given to individuals early in their research career. Restrictions may apply for salary support for some of these positions.
- Investigators may request up to \$30,000 in direct costs.
- Projects must be initiated in 2012 and plan for completion within 12 months. Short-term policy relevant projects will be given the greatest consideration.

### **Review Criteria:**

Proposals submitted in response to this RFP will be evaluated on their fit with the OMH priority areas listed below, their scientific merit (including feasibility), and their likelihood of providing pilot data or otherwise serving as a key component of future grant applications in the priority area. Preference will be given to individuals early in their research career. We highly encourage potential applicants to seek consultation with senior faculty in the Division of Mental Health Services and Policy Research prior to submitting a proposal. While not a requirement, historically, successful applicants have sought consultation and feedback on their proposals prior to submission. We anticipate making multiple awards, with an effort to represent a wide variety of the topic areas listed below. The review committee will include members of DMHSPR, OMH administration, and other stakeholders, such as providers, program administrators, or consumers; depending on the nature of the application. Because the nature and scope of the proposed evaluations will vary from application to application, the size and duration of each award will also vary within the constraint that projects should be completed; including the production of a

---

<sup>1</sup> The award of the grant funds described in this announcement is dependent upon legislative appropriation and control agency approval, where required. OMH reserves the right to elect not to award all or any grants under this announcement and to waive technical requirements and/or minor inconsistencies or irregularities in any proposal.

final report, within one year. Projects can be up to one year in duration, but project expenditures must be planned for completion by the end of the state fiscal year, March 31, 2012. Reviewers' comments will not be available for unfunded projects.

## **Application Contents:**

### **I. Cover page:**

Provide a cover page that gives the title of the proposed project and the name, degree, academic title, and contact information for the applicant (address, phone number, and email address) plus a brief abstract of the proposal.

### **II. Biographical information:**

- A) Provide a **CV** or **NIH Biographical Sketch** for the applicant
- B) Provide a paragraph describing the applicant's current and long-term **research/career objectives**.
- C) Note name(s) of **current employer(s)** [routes of access to some OMH data vary depending on whether an individual is an employee of OMH/RFMH/other entity]

### **III. Research Plan:**

In a maximum of **5 pages** (single-spaced with 1-inch margins), set forth the proposed research plan including the following 4 Sections presented in the order below:

- A) **Specific Aims** (including which of the area(s) listed below the project addresses),
- B) **Background and Significance** (include a review of the literature sufficient to justify the rationale for conducting the proposed project),
- C) **Preliminary Studies** (if relevant),
- D) **Research Design and Methods** (this should be the longest section - at least 2 pages; also include a discussion of anticipated next steps following completion of the project).

Projects may be up to **one year** in duration and must produce brief **interim and final reports**. These reports will be reviewed by a Scientific Advisory Committee which will oversee this funding mechanism and look for ways to enhance the feasibility and utility of these projects. Ideally, the final report will also be suitable for incorporation into a policy briefing to the OMH Commissioner as well as suitable for a poster presentation at a scientific meeting or brief report to a journal such as *Psychiatric Services* or *Journal of Administration in Public Policy and Mental Health Services Research*.

### **IV. Budget:**

Provide the following:

- A) **Detailed Budget** (direct costs only; indirect costs, if any, will be negotiated separately; we anticipate that no indirect costs will be required for work completed by employees of RFMH),
- B) **Budget Justification** (briefly justify each line item)
- C) **Project Timeline** (a table or chart is preferable, but a text paragraph is also adequate)

Funds may support data collection, recruitment of research participants (e.g., outreach activities, stipends for participants), data analysis, and dissemination of findings. *Core staff from the Division may be available to assist with data analysis. Applicants should budget for their projected analytic needs; if core staff are available to offset these expenses, these adjustments will be made at the time of the award.* Individuals in T32 lines are *not* allowed to use these funds as non-federal dollars to supplement their federal stipends. Funds may also be used for purposes such as travel, salaries and fringe benefits, meeting expenses, paying consultants and research assistants so long as all expenses relate directly to carrying out the applicant's proposed project. Individuals who are full-time OMH employees and who wish to apply for these grants may do so as long as they demonstrate that they meet the following criteria: the proposed research project will not interfere with the employee's official duties (i.e., either the proposed project will be an extension of the employee's current work and approved by the employee's supervisor, or the project will be conducted outside of normal business hours). While full-time OMH employees cannot draw salary from these small grants, they may seek funds through this grant mechanism for other research expenses (fees to pay study participants, statistical consultation, etc.). Part-time OMH employees may request salary support for that portion of their full-time salary not paid by OMH. Applicants are welcome to contact Dr. Stroup (contact information listed below) with any questions.

**Submission of proposals:**

Please email your application to Scott Stroup at [stroups@nyspi.columbia.edu](mailto:stroups@nyspi.columbia.edu) plus send a hard copy to him at the address below.

As much as possible, please combine all pieces of the application into a single Word or PDF file to ensure all parts of your application get reviewed by the review committee.

Individuals may submit more than one proposal.

**Due date for the first round of applications:** April 9, 2012 at 5:00 PM.

**Earliest Start Date:** May 17, 2012.

**Questions?**

Potential applicants who have questions or who would like assistance in developing their ideas are encouraged to contact (note that historically, successful candidates have sought consultation and feedback on their proposal prior to submitting):

Scott Stroup, MD, MPH  
Department of Mental Health Services and Policy Research  
New York State Psychiatric Institute  
Room 2703, Box 100  
1051 Riverside Drive  
New York, NY 10032  
Phone: 212-543-5676  
email: [stroups@nyspi.columbia.edu](mailto:stroups@nyspi.columbia.edu)

**For administrative questions (budget, etc.), please contact:**

**Anne M. Skrobala, M.A.**  
Administrator, Department of Mental Health Services and Policy Research  
Room 2700, Box 100  
1051 Riverside Drive  
New York, NY 10032  
Phone: 212-543-5954  
Fax: 212-543-5085  
email: [skrobal@nyspi.columbia.edu](mailto:skrobal@nyspi.columbia.edu)

**Informational Meeting: Tuesday, March 27, 2012, 4:00 PM**

An optional informational meeting will be held for individuals who would like to learn more about this initiative. This informational meeting will be on Tuesday, March 27, 2012 at 4:00 PM in **NYSPI Room 1706C**. Potential applicants as well as investigators who may have members of their research groups who could be applicants are welcome to attend and ask any questions they may have.

**2012-13 OMH Policy Scholars RFP**  
**Potential Policy Scholars Topics of Interest to OMH**

**Examples of topics of particular interest to OMH for Policy Scholars Projects include:**

- **Impact of the OMH’s implementation of Behavioral Health Organizations on discharge planning and client outcomes.**
- **Impact of the NY Department of Health’s implementation of Health Homes on quality of mental health care and client outcomes.**
- **Improving engagement and retention in appropriate services and decreasing fragmentation for high need and high cost individuals, including:**
  - **High-risk individuals who become disengaged from care**
  - **Individuals with co-occurring disorders**
  - **Individuals with serious health issues**
- **Improving access and decreasing fragmentation for people with unmet needs within the mental health system, including:**
  - **Racial and ethnic minorities**
  - **Persons with language barriers**
  - **Immigrants with mental health needs**
  - **Older adults**
  - **Individuals with serious mental illness leaving prison**
- **Promoting Recovery and Success with Living**
  - **Infusion of cultural competence into recovery-oriented approaches**
  - **Peer education and training aimed at competitive employment**
  - **Personalized Recovery-Oriented Services (PROS, <http://www.omh.state.ny.us/omhweb/pros/>)**
- **Improving psychotropic medication prescribing practices**
- **Improving quality through the provision of incentives for positive outcomes**
  - **Refocusing oversight toward good clinical practice**
  - **Providing technical assistance to improve clinical competencies**
  - **Improving the coordination and integration of care**
- **Support of Physical and Mental Wellness**
- **Advancement of Evidenced-based practices**
- **Integration of care for co-occurring mental health and substance use disorders**
- **Meeting the physical health needs of individuals with mental health disorders**

**Examples of policy-relevant mental health services research projects could include (this list is illustrative and is not an exhaustive list):**

- Identify ways to improve the physical health of people with serious medical disorders (e.g., smoking cessation, weight management, enhanced metabolic monitoring).
- Measure the uptake of the IPS approach to supported employment of agencies and clients
- Explore promising practices that integrate supported employment as a part of clinical care (e.g., “Return to Work” strategies in sports medicine and workers compensation; lessons learned to think about employment as a cost containment strategy in managed care)
- Pilot test and evaluate a smoking cessation program for people with serious mental illness.

- Develop or refine fidelity tools for implementing evidence-based practices, particularly tools which help clinical staff carry out an intervention and which also can be summarized to assess uptake of a particular intervention.
- Evaluate the ongoing access to care for older individuals with SMI.
- Assess the impact of the Center for Practice Innovations' online training for treating co-occurring disorders
- Identify approaches to strengthen linkages between inpatient and community programs to promote engagement in appropriate services post discharge;
- Characterize the efforts made by Behavioral Health Organizations to ensure that individuals are engaged in appropriate care post discharge
- Characterize the impact of Health Homes on the health of individuals with serious mental illnesses
- Pilot test and evaluate promising peer-run or peer-facilitated interventions, e.g. for employment success
- Pilot programs that increase the appropriate use of clozapine
- Evaluate the role of peer staff on ACT teams
- Investigate how OMH housing programs influence housing choices of consumers
- Investigate how obtaining employment alters use of general and mental health services
- Investigate agency and staff predictors of good clinical supervision
- Evaluate the impact that clinical supervision has on acquiring new skills and on client outcomes
- Identify barriers and facilitators for good clinical supervision, particularly with respect to treating co-occurring disorders
- Evaluate the impact of distance learning techniques for gaining new clinical skills

**This year OMH has identified the following two initiatives for which a policy scholar could play a key role. Successful applicants would have the opportunity to work closely with senior OMH staff as they design and implement evaluations of these initiatives while also having the opportunity to see first-hand how large projects aimed at changing practitioner behavior are designed, implemented, and sustained.**

- Design and carry out an impact analysis of suicide-prevention efforts in the state psychiatric facilities. OMH is planning to pilot a suicide-prevention program in several state adult psychiatric centers (state hospitals). The program will involve changing the culture and core values around suicide so that it is viewed it as an event that must never happen as well as implementing evidenced based clinical care (use of empirically validated risk assessment, treatment methodologies, safety planning, follow-up, and support).
- Design and carry out an evaluation of the cost benefit and efficacy of using EMMA (Electronic Medication Management Assistant) in OMH residential settings. EMMA is a remote medication management system which controls and monitors the administration of medications. EMMA's manufacturer notes that it has been used successfully with individuals with cognitive impairments who have difficulty remembering the dosing and timing of their medication regimens and who would otherwise need ongoing supervision in taking their medications. OMH would like to evaluate EMMA's effectiveness and estimate costs/savings associated with its use in OMH's residential settings.

List of OMH Policy Scholars and research topics to date.

| <b>Project Year</b> | <b>Recipient of Award</b>                                                                                                                                                                                                                                                               | <b>Project Title</b>                                                                                                                                                                                                                                                                             |
|---------------------|-----------------------------------------------------------------------------------------------------------------------------------------------------------------------------------------------------------------------------------------------------------------------------------------|--------------------------------------------------------------------------------------------------------------------------------------------------------------------------------------------------------------------------------------------------------------------------------------------------|
| <b>2007-2008</b>    | <b>Pamela Y Collins, MD, MPH</b> , Assistant Professor of Clinical Epidemiology and Clinical Psychiatry                                                                                                                                                                                 | Cultural Competence and Mental Health Service Needs among African Diaspora Populations living with HIV/AIDS: A Systemic Intervention Approach                                                                                                                                                    |
| <b>2007-2008</b>    | <b>Fang-pei Chen, MSW, PhD</b> , Assistant Professor, Columbia University School of Social Work                                                                                                                                                                                         | Discharge from Assertive Community Treatment Services: A Multiple-Perspective Study                                                                                                                                                                                                              |
| <b>2007-2008</b>    | <b>Richard B. Krueger, MD</b> , Medical Director, Sexual Behavior Clinic, NYSPI & Columbia University Department of Psychiatry                                                                                                                                                          | An Analysis of Treatment Response and Medication Satisfaction in a Group of Patients with Gonadotropin Releasing Hormones Agonist Therapy for Hypersexual and/or Paraphilic Disorders and An Analysis of Diagnoses of a Group of Patients Arrested for Crimes Against Children over the Internet |
| <b>2007-2008</b>    | <b>Rufina J. Lee, MSW, PhD</b> , Post-doctoral Fellow, Psychiatric Epidemiology Training Program, Mailman School of Public Health, Columbia University                                                                                                                                  | A Pilot Study of Joint Crisis Plans for Residents of NY/NY Supported Housing                                                                                                                                                                                                                     |
| <b>2007-2008</b>    | <b>Ellen Lukens PhD, LCSW</b> , Firestone Centennial Associate Professor of Clinical Social Work, Columbia University School of Social Work and <b>Lauren B. Gates PhD</b> , Senior Research Scientist & Research Director, Workplace Center, Columbia University School of Social Work | Diffusion of Evidence-Based Practice: A Follow-Up Evaluation of Graduates of the OMH NYS Dean's of Social Work Consortium Project for Evidence Based Practice                                                                                                                                    |
| <b>2007-2008</b>    | <b>Jennifer I. Manuel, LMSW</b> , Doctoral Candidate, NIMH Predoctoral Fellow, Columbia University School of Social Work                                                                                                                                                                | Temporal Patterns of Outpatient Service Use, Medication Adherence, and Psychiatric Hospitalization among Individuals with Co-occurring Disorders                                                                                                                                                 |
| <b>2007-2008</b>    | <b>Scott Nolen, JD, PhD</b> , T32 Child Psychiatry Research Fellow, NYSPI                                                                                                                                                                                                               | Understanding How Juvenile Court Judges Use Youth's Mental Health Information During Adjudication                                                                                                                                                                                                |



|                  |                                                                                                                                                                       |                                                                                                                                           |
|------------------|-----------------------------------------------------------------------------------------------------------------------------------------------------------------------|-------------------------------------------------------------------------------------------------------------------------------------------|
| <b>2007-2008</b> | <b>Ilana Nossel, MD</b> , Psychiatry Resident, Columbia University Department of Psychiatry, NYSPI                                                                    | Frequent Users of the New York Presbyterian Hospital/Columbia CPEP: Understanding the Problem and Strategizing for Change                 |
| <b>2007-2008</b> | <b>Sandra S. Pimentel, PhD</b> , Postdoctoral Research Fellow, Columbia University/NYSPI, Department of Child & Adolescent Psychiatry                                 | Disseminating Evidence-Based Treatments for Children: A Microanalysis of Consultation Calls as an Ongoing Training Strategy               |
| <b>2007-2008</b> | <b>Joan Prudic, MD</b> , Associate Professor of Clinical Psychiatry, NYSPI                                                                                            | Electroconvulsive Therapy in Chronically Psychotic Patients: Towards Evidence Based Treatment                                             |
| <b>2007-2008</b> | <b>Lisa Hunter Romanelli, PhD</b> , Assistant Professor of Clinical Psychology, Columbia University/NYSPI                                                             | Treatment Practices for Disruptive Behavior Disorders: A Survey of New York State School-Based Mental Health Clinics                      |
| <b>2007-2008</b> | <b>Alissa A. Taylor, PhD</b> , Instructor of Clinical Psychology in Psychiatry                                                                                        | Consultation and Supervision: Review and Recommendations for Effective Dissemination of EBTs                                              |
| <b>2008-2009</b> | <b>Mary A. Cavaleri, PhD</b> , Research Associate                                                                                                                     | Determining the Feasibility and Effectiveness of IPT:EST, a Peer-delivered Triage, Evaluation, and Structured Intervention for Depression |
| <b>2008-2009</b> | <b>James Rodriguez, PhD</b> , Instructor in Clinical Psychology (in Psychiatry), Columbia University                                                                  | An exploratory study of parenting skills training among Family Advocates in New York State                                                |
| <b>2008-2009</b> | <b>Hilary B. Vidair, PhD</b> , Post-Doctoral Research Fellow, Research Training Program in Child Psychiatry, New York State Psychiatric Institute/Columbia University | Evaluating the Effects of a Psychosocial Treatment Program for Depressed Mothers and Their Suicidal Adolescents                           |
| <b>2008-2009</b> | <b>Jennifer P. Wisdom, PhD MPH</b> , Assistant Professor of Clinical Psychology (in Psychiatry), Columbia University                                                  | Youth Transitioning from Child to Adult Mental Health Services: A Mixed-Method Analysis of Needs and Services Utilization                 |
| <b>2009-2010</b> | <b>Melissa Arbuckle, MD, PhD</b> , Assistant Professor in Clinical Psychiatry Columbia University Medical Center                                                      | Integrating Standardized Patient Assessment into the Routine Clinical Practice of Psychiatric Residents                                   |

|                  |                                                                                                                                                                            |                                                                                                                                                                           |
|------------------|----------------------------------------------------------------------------------------------------------------------------------------------------------------------------|---------------------------------------------------------------------------------------------------------------------------------------------------------------------------|
| <b>2009-2010</b> | <b>Leopoldo J. Cabassa, PhD</b> , Assistant Director, New York State Center of Excellence for Cultural Competence                                                          | Development of A Mental Health Literacy Program for Hispanics with Limited English Proficiency                                                                            |
| <b>2009-2010</b> | <b>Kristin Leight, MD, and Elizabeth Fitelson, MD</b> , Psychiatry Attendings, Columbia University Department of Psychiatry                                                | Pregnancy in the Severely Mentally Ill:<br>Identifying the Population and Understanding Unmet Needs                                                                       |
| <b>2009-2010</b> | <b>Erum Nadeem, PhD</b> , Research Scientist, Research Foundation for Mental Hygiene, Inc. @NYSPI                                                                          | Supporting The Implementation of Evidence-Based Treatments for Children: A Microanalysis of Supervisory Consultation Calls as an Ongoing Sustainability Strategy          |
| <b>2009-2010</b> | <b>Sapana R. Patel, PhD</b> , Assistant Professor of Psychology (in Psychiatry), Columbia University, Department of Psychiatry                                             | Shared Decision Making for Pregnant Women with Bipolar Disorder                                                                                                           |
| <b>2009-2010</b> | <b>Carolyn Rodriguez, MD, PhD</b> , Postdoctoral Research Fellow, Mood and Anxiety Disorders, NYSPI, Assistant Attending in Psychiatry, Columbia University Medical Center | Compulsive Hoarding as A Potential Modifiable Risk Factor for Homelessness: A Pilot Study of Prevalence and Services Utilization                                          |
| <b>2009-2010</b> | <b>Lawrence H. Yang, PhD</b> , Assistant Professor, Department of Epidemiology, School of Public Health, Columbia University                                               | Adaptation of the "In Our Own Voice-Family Companion" Anti-Stigma Intervention to Chinese American Relatives of People with Psychotic-Spectrum Disorders in New York City |
|                  |                                                                                                                                                                            |                                                                                                                                                                           |
| <b>2010-2011</b> | <b>Melissa Arbuckle, MD, PhD</b> , Assistant Professor in Clinical Psychiatry Columbia University Medical Center                                                           | Engaging Residents in Implementation and Quality Improvement Strategies                                                                                                   |
| <b>2010-2011</b> | <b>Carl Erik Fisher, MD</b> , Resident in Psychiatry, Columbia University                                                                                                  | The New York City Mental Health Care Monitoring Initiative: Opinions and Perceptions of Public Mental Health System Leadership                                            |

|                  |                                                                                                                                                                                                |                                                                                                                                          |
|------------------|------------------------------------------------------------------------------------------------------------------------------------------------------------------------------------------------|------------------------------------------------------------------------------------------------------------------------------------------|
| <b>2010-2011</b> | <b>Jennifer I. Manuel, PhD, LMSW,</b> Assistant Professor of Clinical Psychiatric Social Work (in Psychiatry), Columbia University                                                             | A Web-Based Program to Promote Consumer Choice in Psychiatric Treatment                                                                  |
| <b>2010-2011</b> | <b>Su-chin Serene Olin, PhD,</b> Instructor, Clinical Psychology (in Psychiatry), Columbia University                                                                                          | Developing a Training Curriculum to Improve the Integration of Family-to-Family Services in OMH-licensed Clinics                         |
| <b>2010-2011</b> | <b>Sharat Parameswaran, MD, and Matthew Erlich, MD,</b> Psychiatry Residents in Training, Columbia University College of Physicians & Surgeons<br>Columbia University Department of Psychiatry | Implementation Strategies and Evaluation of SHAPE MEDs, An OMH Antipsychotic Mediation Care Pathway                                      |
| <b>2010-2011</b> | <b>Elizabeth Werner, PhD,</b> Clinical Research Projects Manager, Columbia University Medical Center, Department of Psychiatry                                                                 | Testing the Feasibility and Acceptability of a Behavioral Intervention for Postpartum Depression in a High-Risk Community Sample         |
|                  |                                                                                                                                                                                                |                                                                                                                                          |
| <b>2011-2012</b> | <b>Melissa Arbuckle, MD, PhD,</b> Assistant Professor in Clinical Psychiatry<br>Columbia University Medical Center                                                                             | Training the Trainers: Disseminating and Adapting a Quality Improvement Curriculum                                                       |
| <b>2011-2012</b> | <b>Alice Saperstein, PhD,</b> Assistant Professor of Clinical Psychology (in Psychiatry), Columbia University                                                                                  | Recovery Orientation in Community Mental Health: A Preliminary Examination of Personalized Recovery-Oriented Services (PROS) in New York |
| <b>2011-2012</b> | <b>Katherine Elkington, PhD,</b> Assistant Professor of Clinical Psychology (in Psychiatry), HIV Center for Clinical and Behavioral Studies, Columbia University                               | From the probation system to the mental health system: Understanding youth engagement                                                    |
| <b>2011-2012</b> | <b>Sharat Parameswaran, MD, and Matthew Erlich, MD,</b> Psychiatry Residents in Training, Columbia University College of Physicians & Surgeons<br>Columbia University Department of Psychiatry | Implementation Strategies and Evaluation of SHAPE MEDs, An OMH Antipsychotic Mediation Care Pathway, continued                           |
|                  |                                                                                                                                                                                                |                                                                                                                                          |

|                         |                                                                                                                                                                                                     |                                                                                                                                                      |
|-------------------------|-----------------------------------------------------------------------------------------------------------------------------------------------------------------------------------------------------|------------------------------------------------------------------------------------------------------------------------------------------------------|
| <p><b>2012-2013</b></p> | <p><b>Neil Aggarwal, M.D., M.B.A., M.A.,</b><br/>Center of Excellence for Cultural Competence, New York State Psychiatric Institute</p>                                                             | <p>Development of the Cultural Formulation Interview Implementation Instrument (The CFI-II): A Method to Rate Fidelity in Cultural Communication</p> |
| <p><b>2012-2013</b></p> | <p><b>Carolyn Rodriguez, M.D., Ph.D.,</b><br/>Assistant Professor of Clinical Psychiatry, NYSPI and Columbia University Medical Center</p>                                                          | <p>Time Intervention for Individuals with Hoarding Disorder Seeking Eviction Prevention Services</p>                                                 |
| <p><b>2012-2013</b></p> | <p><b>Sapana Patel, Ph.D.,</b> Assistant Professor of Psychology (in Psychiatry)/ Research Scientist IV, Columbia University, Department of Psychiatry and New York State Psychiatric Institute</p> | <p>Examining Treatment Delivery for Obsessive Compulsive Disorder</p>                                                                                |
